# Supplementary material for: Immune responsiveness to phytohemagglutinin displays species but not sex differences in three anuran species
Source: PeerJ. 2017 May 3;5:e3181. doi: 10.7717/peerj.3181 (PMC5419208; doi:10.7717/peerj.3181)
Supplement: Supplemental Information 1 — Original data for the changes of body mass prior to injection (0 h) and 72 h after injection, as well as the changes of the swelling response at 0 h, and 6, 12, 24, 48 and 72 h after injection. [file peerj-05-3181-s001.xls]

## Sheet: Sheet1
code	sampling time point	sex	species	body mass	pha1	pha2	pha3	pha4	pha5	pha6	pbs1	pbs2	pbs3	pbs4	pbs5	pbs6
1	1	1	1	65.12	3.51	3.51	3.53	3.46	3.52	3.46	3.65	3.64	3.62	3.61	3.66	3.63
2	1	1	1	63	3.51	3.49	3.55	3.52	3.51	3.49	3.38	3.32	3.38	3.36	3.38	3.32
3	1	1	1	58.93	3.26	3.17	3.19	3.22	3.21	3.23	3.2	3.28	3.25	3.19	3.24	3.2
4	1	1	1	78.12	3.19	3.21	3.2	3.19	3.18	3.15	3.22	3.17	3.2	3.19	3.22	3.22
5	1	1	1	69.03	3.24	3.25	3.2	3.24	3.25	3.21	3.11	3.08	3.11	3.13	3.11	3.11
6	1	1	1	64.32	3.47	3.46	3.47	3.49	3.41	3.47	3.46	3.43	3.45	3.44	3.47	3.44
7	1	1	1	86.36	3.5	3.47	3.51	3.51	3.52	3.5	3.45	3.41	3.41	3.49	3.48	3.42
8	1	1	1	67.59	3.15	3.11	3.16	3.18	3.15	3.13	3.12	3.1	3.12	3.11	3.12	3.1
1	2	1	1		4.43	4.45	4.45	4.47	4.49	4.46	4.01	4.02	4	4.02	4	4.04
2	2	1	1		3.82	3.79	3.84	3.85	3.86	3.81	3.59	3.51	3.52	3.55	3.52	3.51
3	2	1	1		3.85	3.88	3.85	3.81	3.83	3.8	3.68	3.74	3.71	3.72	3.68	3.68
4	2	1	1		4.63	4.62	4.63	4.61	4.61	4.6	4.51	4.54	4.51	4.51	4.52	4.55
5	2	1	1		4.52	4.57	4.59	4.57	4.58	4.56	4.21	4.28	4.24	4.23	4.22	4.2
6	2	1	1		4.76	4.78	4.76	4.77	4.79	4.76	3.81	3.8	3.84	3.8	3.83	3.81
7	2	1	1		4.63	4.57	4.67	4.66	4.57	4.66	3.78	3.79	3.8	3.79	3.78	3.76
8	2	1	1		4.19	4.12	4.18	4.15	4.16	4.17	3.78	3.72	3.76	3.71	3.72	3.7
1	3	1	1		4.66	4.68	4.67	4.66	4.62	4.67	3.95	3.95	3.92	3.92	3.91	3.97
2	3	1	1		4.55	4.59	4.59	4.55	4.58	4.58	4.19	4.16	4.12	4.16	4.15	4.16
3	3	1	1		4.32	4.33	4.33	4.34	4.36	4.37	4.04	4.01	4.04	4.02	4.01	4
4	3	1	1		5.37	5.41	5.38	5.42	5.41	5.41	4.4	4.47	4.46	4.42	4.41	4.4
5	3	1	1		4.78	4.84	4.84	4.8	4.83	4.81	4.21	4.23	4.24	4.19	4.22	4.2
6	3	1	1		4.97	4.98	4.91	4.91	4.94	4.93	4.27	4.28	4.27	4.26	4.29	4.33
7	3	1	1		5.02	5.02	5.1	5.05	5.05	5.06	4.05	4.02	4.01	4	4.02	4
8	3	1	1		4.47	4.45	4.41	4.49	4.49	4.47	4.11	4.08	4.13	4.09	4.07	4.06
1	4	1	1		5.27	5.3	5.26	5.27	5.31	5.29	4.77	4.71	4.73	4.72	4.73	4.73
2	4	1	1		4.96	4.97	4.99	5.03	5.01	5	4.25	4.26	4.27	4.26	4.22	4.23
3	4	1	1		4.6	4.66	4.63	4.63	4.67	4.63	4.12	4.13	4.14	3.16	4.12	4.11
4	4	1	1		5.52	5.54	5.53	5.57	5.54	5.55	4.56	4.55	4.54	4.52	4.57	4.53
5	4	1	1		4.95	4.89	4.94	4.89	4.92	4.9	4.08	4.06	4.08	4.07	4.02	4.03
6	4	1	1		5.19	5.18	5.15	5.11	5.17	5.16	4.52	4.51	4.49	4.52	4.49	4.47
7	4	1	1		5.17	5.18	5.15	5.18	5.14	5.13	4.03	4.08	4.08	4.03	4.03	4.05
8	4	1	1		4.68	4.69	4.68	4.67	4.68	4.68	4.28	4.32	4.29	4.3	4.31	4.24
1	5	1	1		4.84	4.81	4.79	4.8	4.79	4.81	4.45	4.47	4.49	4.4	4.45	4.47
2	5	1	1		4.42	4.41	4.43	4.45	4.45	4.44	3.99	4.02	4	4.02	3.98	3.98
3	5	1	1		4.48	4.46	4.49	4.46	4.47	4.49	4.15	4.2	4.22	4.23	4.21	4.22
4	5	1	1		5.42	5.5	5.46	5.45	5.47	5.43	4.84	4.82	4.84	4.82	4.83	4.84
5	5	1	1		4.41	4.41	4.45	4.42	4.48	4.46	4.21	4.23	4.22	4.23	4.2	4.19
6	5	1	1		4.86	4.83	4.82	4.88	4.86	4.85	4.3	4.36	4.33	4.31	4.35	4.34
7	5	1	1		4.52	4.57	5.57	4.58	4.55	4.53	4.04	4.09	4.07	4.06	4.04	4.05
8	5	1	1		4.62	4.66	4.67	4.68	4.67	4.61	4.32	4.38	4.38	4.37	4.38	4.31
1	6	1	1	63.96	3.78	3.76	3.75	3.77	3.81	3.78	3.58	3.55	3.57	3.54	3.58	3.56
2	6	1	1	61.24	3.56	3.5	3.56	3.55	3.54	3.5	3.32	3.34	3.31	3.3	3.34	3.36
3	6	1	1	56.44	3.87	3.82	3.9	3.86	3.86	3.89	3.68	3.67	3.65	3.66	3.63	3.63
4	6	1	1	76.65	3.67	3.65	3.71	3.68	3.68	3.69	3.46	3.47	3.44	3.42	3.45	3.42
5	6	1	1	66.29	3.58	3.59	3.55	3.55	3.58	3.62	3.44	3.43	3.44	3.45	3.43	3.41
6	6	1	1	62.67	3.66	3.65	3.64	3.62	3.64	3.62	3.51	3.56	3.55	3.54	3.51	3.53
7	6	1	1	85.45	3.76	3.71	3.68	3.69	3.73	3.73	3.56	3.55	3.58	3.61	3.6	3.61
8	6	1	1	64.37	3.85	3.85	3.88	3.82	3.83	3.85	3.45	3.43	3.45	3.51	3.5	3.48
1	1	2	1	74.56	3.17	3.19	3.12	3.16	3.16	3.11	3.3	3.33	3.32	3.26	3.24	3.3
2	1	2	1	63.47	2.92	2.9	2.9	2.94	2.91	2.95	3	2.95	2.94	2.99	3	3.01
3	1	2	1	70.12	3.32	3.28	3.32	3.37	3.28	3.27	3.18	3.22	3.23	3.26	3.18	3.24
4	1	2	1	54.37	3.25	3.32	3.32	3.31	3.3	3.32	3.34	3.34	3.36	3.34	3.32	3.32
5	1	2	1	73.19	3.24	3.29	3.28	3.25	3.23	3.27	3.27	3.26	3.25	3.25	3.26	3.25
6	1	2	1	63.48	3.15	3.2	3.16	3.15	3.16	3.14	3.43	3.45	3.4	3.43	3.4	3.43
7	1	2	1	54.38	3.33	3.3	3.32	3.31	3.32	3.33	3.45	3.38	3.43	3.45	3.44	3.43
8	1	2	1	56.24	3.74	3.79	3.76	3.79	3.76	3.75	3.45	3.5	3.48	3.46	3.5	3.48
9	1	2	1	53.27	3.55	3.51	3.56	3.58	3.58	3.56	3.67	3.65	3.62	3.65	3.61	3.64
10	1	2	1	65.2	3.49	3.53	3.52	3.5	3.51	3.49	3.41	3.48	3.46	3.45	3.46	3.45
1	2	2	1		4.38	4.34	4.35	4.36	4.37	4.36	4	4.06	4.01	4.03	4.02	4.02
2	2	2	1		3.69	3.64	3.6	3.67	3.64	3.66	3.45	3.48	3.46	3.48	3.46	3.45
3	2	2	1		4.22	4.22	4.24	4.22	4.22	4.24	3.55	3.51	3.55	3.53	3.51	3.53
4	2	2	1		4.66	4.67	4.65	4.59	4.64	4.62	4.17	4.1	4.12	4.13	4.11	4.14
5	2	2	1		4.37	4.33	4.35	4.33	4.35	4.36	4.01	4.01	4.02	4.03	4.01	4.08
6	2	2	1		4.43	4.45	4.43	4.44	4.41	4.44	3.66	3.65	3.66	3.67	3.68	3.63
7	2	2	1		4.38	4.37	4.35	4.37	4.36	4.35	4	4.05	4.03	4.01	4	4.04
8	2	2	1		4.65	4.69	4.66	4.67	4.67	4.63	4.48	4.45	4.41	4.42	4.44	4.44
9	2	2	1		4.23	4.24	4.23	4.21	4.22	4.23	4.01	3.97	4.02	4.01	4.04	4.02
10	2	2	1		4.22	4.25	4.22	4.25	4.22	4.22	3.77	3.76	3.74	3.74	3.75	3.74
1	3	2	1		4.59	4.57	4.59	4.52	4.58	4.58	4.05	4.05	4.02	4	4.01	4.02
2	3	2	1		4.33	4.27	4.29	4.29	4.3	4.33	3.67	3.68	3.69	3.73	3.7	3.71
3	3	2	1		4.59	4.55	4.56	4.58	4.58	4.58	4.13	4.11	4.11	4.1	4.08	4.1
4	3	2	1		5.04	5.03	5.01	5	5.03	5.02	4.13	4.17	4.15	4.13	4.13	4.13
5	3	2	1		4.53	4.56	4.55	4.53	4.51	4.56	3.99	3.93	3.95	3.92	3.91	3.92
6	3	2	1		4.6	4.55	4.58	4.6	4.61	4.63	4.01	4.02	4.02	4.01	4	4.02
7	3	2	1		4.68	4.7	4.63	4.67	4.65	4.66	4.3	4.29	4.28	4.27	4.28	4.28
8	3	2	1		4.78	4.81	4.82	4.83	4.81	4.82	4.07	4.02	4.01	4	4.02	4.02
9	3	2	1		4.92	4.95	4.95	4.95	4.94	4.91	4.33	4.32	4.29	4.3	4.27	4.31
10	3	2	1		4.48	4.54	4.57	4.53	4.52	4.54	3.97	4.01	4.03	4	4.02	4.02
1	4	2	1		5.02	5.03	5.02	5	5.04	5.03	4.29	4.28	4.26	4.23	4.29	4.27
2	4	2	1		5.05	5.01	5.03	5.02	5.05	5.04	4.21	4.2	4.25	4.24	4.22	4.2
3	4	2	1		5.66	5.07	5.08	5.11	5.12	5.1	4.33	4.32	4.33	4.33	4.3	4.31
4	4	2	1		5.69	5.69	5.66	5.68	5.68	5.66	4.39	4.35	4.41	4.4	4.35	4.2
5	4	2	1		5.4	5.42	5.43	5.41	5.43	5.44	4.84	4.83	4.82	4.81	4.84	4.81
6	4	2	1		5.45	5.45	5.44	5.42	5.46	5.47	4.03	4.08	4.09	4.06	4.06	4.07
7	4	2	1		5.26	5.27	5.29	5.28	5.28	5.29	4.32	4.36	4.35	4.34	4.34	4.33
8	4	2	1		5.45	5.45	5.46	5.48	5.47	5.46	4.51	4.56	4.53	4.52	4.5	4.54
9	4	2	1		5.28	5.28	5.32	5.33	5.34	5.31	4.41	4.48	4.41	4.4	4.43	4.48
10	4	2	1		5.47	5.48	5.49	5.51	5.5	5.48	4.43	4.4	4.43	4.45	4.43	4.46
1	5	2	1		4.44	4.42	4.42	4.48	4.52	4.47	3.99	4.01	3.98	4	4	4.02
2	5	2	1		4.97	4.9	4.9	4.97	4.94	4.92	4.54	4.49	4.48	4.5	4.51	4.48
3	5	2	1		4.63	4.63	4.62	4.62	4.62	4.58	4.22	4.21	4.23	4.2	4.22	4.21
4	5	2	1		5.09	5.03	5.03	5.05	5.07	5.04	4.78	4.77	4.77	4.79	4.8	4.82
5	5	2	1		4.83	4.88	4.87	4.86	4.84	4.86	4.39	4.39	4.41	4.44	4.41	4.42
6	5	2	1		4.65	4.66	4.67	4.63	4.65	4.66	3.9	3.95	3.96	3.92	3.94	3.94
7	5	2	1		4.76	4.75	4.75	4.76	4.76	4.78	4.34	4.38	4.36	4.31	4.33	4.39
8	5	2	1		5.03	5.02	5	5.01	5.02	5.02	4.41	4.43	4.42	4.39	4.38	4.38
9	5	2	1		4.56	4.51	4.51	4.53	4.47	4.49	4.32	4.39	4.3	4.38	4.32	4.37
10	5	2	1		5.07	5.07	5.04	5.02	5.07	5.04	4.42	4.45	4.43	4.45	4.44	4.44
1	6	2	1	68.33	3.78	3.76	3.75	3.77	3.81	3.78	3.58	3.55	3.57	3.54	3.58	3.56
2	6	2	1	58.42	3.56	3.5	3.56	3.55	3.54	3.5	3.32	3.34	3.31	3.3	3.34	3.36
3	6	2	1	66.67	3.87	3.82	3.9	3.86	3.86	3.89	3.68	3.67	3.65	3.66	3.63	3.63
4	6	2	1	51.16	3.67	3.65	3.71	3.68	3.68	3.69	3.46	3.47	3.44	3.42	3.45	3.42
5	6	2	1	70.88	3.58	3.59	3.55	3.55	3.58	3.62	3.44	3.43	3.44	3.45	3.43	3.41
6	6	2	1	61.56	3.66	3.65	3.64	3.62	3.64	3.62	3.51	3.56	3.55	3.54	3.51	3.53
7	6	2	1	49.23	3.76	3.71	3.68	3.69	3.73	3.73	3.56	3.55	3.58	3.61	3.6	3.61
8	6	2	1	48.29	3.85	3.85	3.88	3.82	3.83	3.85	3.45	3.43	3.45	3.51	3.5	3.48
9	6	2	1	48.94	3.71	3.73	3.72	3.73	3.71	3.77	3.67	3.71	3.68	3.7	3.67	3.69
10	6	2	1	62.82	3.99	3.98	3.97	3.96	3.95	3.92	3.76	3.73	3.74	3.72	3.7	3.71
1	1	1	2	60.07	3.53	3.5	3.51	3.51	3.52	3.51	3.92	3.91	3.91	3.97	3.91	3.92
2	1	1	2	61.31	3.91	3.97	3.92	3.97	3.91	3.96	3.72	3.71	3.72	3.72	3.71	3.77
3	1	1	2	57.16	3.76	3.78	3.76	3.71	3.72	3.77	3.62	3.68	3.67	3.68	3.71	3.62
4	1	1	2	59.16	3.65	3.64	3.68	3.63	3.61	3.67	3.77	3.71	3.72	3.74	3.72	3.71
5	1	1	2	53.58	3.44	3.41	3.42	3.41	3.42	3.47	3.39	3.42	3.41	3.42	3.41	3.47
6	1	1	2	64.38	3.2	3.21	3.27	3.2	3.19	3.21	3.27	3.27	3.29	3.31	3.3	3.31
7	1	1	2	71.01	3.34	3.39	3.38	3.37	3.38	3.39	3.4	3.45	3.42	3.41	3.42	3.41
8	1	1	2	87.98	3.42	3.49	3.47	3.42	3.41	3.49	3.41	3.47	3.42	3.43	3.44	3.49
9	1	1	2	57.33	3.31	3.32	3.37	3.38	3.32	3.34	3.25	3.21	3.25	3.21	3.21	3.27
10	1	1	2	62.35	3.51	3.55	3.57	3.58	3.59	3.6	3.61	3.55	3.57	3.58	3.59	3.6
1	2	1	2		4.43	4.41	4.37	4.37	4.41	4.41	3.91	3.97	3.98	3.97	3.91	3.98
2	2	1	2		4.01	4.02	3.98	4	4.01	4.01	3.93	3.94	3.94	3.98	3.91	3.94
3	2	1	2		4.85	4.89	4.86	4.87	4.88	4.87	3.27	3.23	3.24	3.27	3.21	3.22
4	2	1	2		4.76	4.83	4.79	4.8	4.81	4.83	3.98	3.99	3.91	3.98	3.99	3.98
5	2	1	2		3.73	3.72	3.71	3.68	3.67	3.68	3.68	3.59	3.61	3.67	3.65	3.61
6	2	1	2		4.4	4.41	4.42	4.4	4.41	4.42	3.9	3.91	3.91	3.94	3.98	3.95
7	2	1	2		4.27	4.32	4.31	4.27	4.31	4.31	3.93	3.91	3.97	3.98	3.91	3.92
8	2	1	2		4.47	4.48	4.39	4.51	4.41	4.41	4.24	4.25	4.22	4.27	4.21	4.2
9	2	1	2		3.78	3.71	3.74	3.72	3.71	3.72	3.66	3.61	3.65	3.62	3.69	3.61
10	2	1	2		3.74	3.72	3.71	3.74	3.72	3.78	3.55	3.51	3.49	3.57	3.52	3.51
1	3	1	2		4.72	4.76	4.73	4.71	4.73	4.76	4	3.98	3.98	4.01	3.97	4
2	3	1	2		4.77	4.71	4.78	4.71	4.72	4.73	3.99	3.98	4.01	4.04	4.01	4
3	3	1	2		4.49	4.4	4.51	4.49	4.49	4.5	4.17	4.11	4.16	4.17	4.14	4.14
4	3	1	2		4.86	4.89	4.87	4.81	4.87	4.81	4.11	4.09	4.1	4.12	4.1	4.09
5	3	1	2		4.62	4.58	4.55	4.57	4.58	4.6	4.27	4.22	4.24	4.27	4.24	4.27
6	3	1	2		4.89	4.86	4.89	4.89	4.87	4.81	4.33	4.31	4.31	4.31	4.34	4.37
7	3	1	2		4.81	4.82	4.83	4.85	4.87	4.84	3.97	3.98	3.98	4.01	4.01	4
8	3	1	2		5.81	5.87	5.87	5.81	5.89	5.81	5.32	5.31	5.32	5.32	5.31	4.32
9	3	1	2		4.75	4.76	4.79	4.76	4.71	4.76	3.79	3.81	3.82	3.76	3.71	3.76
10	3	1	2		4.72	4.71	4.71	4.78	4.71	4.72	4.01	4.02	4	4.02	4.01	3.99
1	4	1	2		4.13	4.17	4.11	4.14	4.17	4.14	3.82	3.86	3.87	3.81	3.81	3.82
2	4	1	2		4.31	4.29	4.21	4.27	4.21	4.27	4.06	4.11	4.07	4.1	4.11	4.11
3	4	1	2		4.51	4.54	4.53	4.51	4.53	4.51	4.01	4.02	4.1	4.04	4.06	4.01
4	4	1	2		4.4	4.41	4.35	4.37	4.4	4.36	3.83	3.82	3.88	3.88	3.81	3.83
5	4	1	2		4.28	4.27	4.21	4.28	4.25	4.24	4.17	4.21	4.11	4.17	4.14	4.15
6	4	1	2		4.52	4.53	4.57	4.55	4.52	4.57	3.75	3.76	3.81	3.87	3.81	3.76
7	4	1	2		4.78	4.85	4.81	4.82	4.81	4.82	4.21	4.24	4.25	4.25	4.27	4.28
8	4	1	2		4.85	4.82	4.85	4.81	4.81	4.85	4.65	4.63	4.65	4.68	4.69	4.65
9	4	1	2		4.33	4.34	4.32	4.34	4.32	4.31	3.93	3.91	3.92	3.97	3.94	3.92
10	4	1	2		3.82	3.81	3.87	3.86	3.87	3.77	3.76	3.77	3.76	3.78	3.75	3.76
1	5	1	2		4.32	4.33	4.31	4.32	4.32	4.35	4.11	4.11	4.08	4.08	4.12	4.11
2	5	1	2		4.06	4.07	4.08	4.1	4.06	4.07	3.91	3.97	3.98	3.91	3.92	3.98
3	5	1	2		4.55	4.52	4.53	4.51	4.52	4.51	4.26	4.29	4.28	4.3	4.3	4.29
4	5	1	2		4.84	4.83	4.81	4.81	4.83	4.85	4.02	4.03	4.04	4.1	4.11	4.1
5	5	1	2		4.23	4.17	4.19	4.17	4.11	4.11	4.12	4.2	4.19	4.17	4.11	4.11
6	5	1	2		4.24	4.26	4.21	4.27	4.27	4.21	4.05	4.09	4.1	4.11	4.1	4.11
7	5	1	2		4.03	4.01	4.02	4.04	4	4.01	4.02	4	4.02	4.01	4.02	4.01
8	5	1	2		4.62	4.66	4.61	4.62	4.66	4.67	4.56	4.55	4.58	4.6	4.59	4.6
9	5	1	2		4.01	3.98	4.05	4.05	4	4.01	3.92	3.91	3.92	3.92	3.91	3.98
10	5	1	2		4.02	4.01	4.08	4.09	4.08	4.08	3.88	3.82	3.81	3.81	3.82	3.88
1	6	1	2	60.37	3.91	3.98	3.97	3.92	3.95	3.91	3.94	3.94	3.96	3.92	3.91	3.94
2	6	1	2	60.9	3.98	3.96	3.9	3.98	3.95	3.96	3.94	3.93	3.94	3.92	3.92	3.77
3	6	1	2	56.79	4.02	4.04	4.03	4.05	4.03	4.02	4.02	4.01	4.02	4.01	4.02	4.01
4	6	1	2	58.95	4.23	4.25	4.26	4.24	4.23	4.21	4.02	4.02	4.01	4	4.02	4.01
5	6	1	2	52.09	3.87	3.86	3.87	3.85	3.86	3.82	3.72	3.72	3.78	3.72	3.76	3.72
6	6	1	2	63.16	3.76	3.71	3.67	3.69	3.7	3.71	3.67	3.65	3.61	3.65	3.66	3.65
7	6	1	2	70.47	3.56	3.57	3.57	3.59	3.59	3.55	3.5	3.54	3.52	3.51	3.51	3.52
8	6	1	2	86.69	4.21	4.21	4.23	4.24	4.2	4.21	4.11	4.12	4.15	4.12	4.1	4.09
9	6	1	2	56.9	3.65	3.65	3.66	3.67	3.65	3.67	3.65	3.63	3.62	3.61	3.62	3.62
10	6	1	2	61.28	3.67	3.65	3.66	3.65	3.64	3.64	3.61	3.66	3.59	3.6	3.59	3.61
1	1	2	2	119.73	3.78	3.81	3.82	3.8	3.79	3.8	3.84	3.82	3.83	3.84	3.81	3.8
2	1	2	2	77	3.51	3.52	3.58	3.58	3.57	3.51	3.47	3.48	3.49	3.52	3.51	3.48
3	1	2	2	81.43	3.28	3.29	3.3	3.32	3.31	3.32	3.31	3.32	3.37	3.32	3.37	3.32
4	1	2	2	106.4	4.01	4.02	4.03	4.04	4.05	4.09	3.92	3.98	3.97	3.91	3.92	3.94
5	1	2	2	117.16	3.84	3.82	3.89	3.84	3.83	3.83	3.65	3.67	3.61	3.61	3.67	3.61
6	1	2	2	105.28	3.65	3.65	3.67	3.61	3.67	3.65	3.61	3.62	3.63	3.64	3.62	3.64
7	1	2	2	66.47	3.63	3.68	3.68	3.71	3.72	3.71	3.68	3.71	3.71	3.65	3.67	3.69
8	1	2	2	62.34	3.85	3.87	3.89	3.89	3.89	3.89	3.81	3.88	3.86	3.87	3.85	3.89
9	1	2	2	82.72	3.56	3.58	3.57	3.57	3.59	3.51	3.41	3.37	3.39	3.4	3.38	3.37
1	2	2	2		4.43	4.41	4.44	4.44	4.41	4.47	4	4.03	4.01	4.04	4.01	4.02
2	2	2	2		4.09	4.11	4.12	4.1	4.11	4.09	3.98	3.97	3.96	3.91	3.95	3.98
3	2	2	2		3.95	3.98	4.01	4.05	4.02	4	3.79	3.78	3.81	3.81	3.82	3.79
4	2	2	2		4.58	4.55	4.51	4.58	4.52	4.51	4.08	4.11	4.17	4.1	4.11	4.12
5	2	2	2		4.5	4.41	4.51	4.47	4.48	4.49	4.28	4.27	4.21	4.28	4.27	4.21
6	2	2	2		3.94	3.96	3.98	3.99	3.91	3.98	3.68	3.71	3.69	3.69	3.68	3.68
7	2	2	2		4.92	4.98	4.97	4.91	4.92	4.91	4.01	4.02	4	4.02	4.03	4.04
8	2	2	2		4.73	4.76	4.79	4.81	4.79	4.8	4.02	4.01	4.03	4.03	4.04	4.02
9	2	2	2		4.46	4.45	4.43	4.41	4.42	4.45	4.02	4.03	4.01	4.07	4.01	4.02
1	3	2	2		4.68	4.71	4.72	4.7	4.68	4.7	4.1	4.1	4.08	4.02	4.01	4.08
2	3	2	2		4.86	4.82	4.83	4.86	4.81	4.87	3.87	3.87	3.88	3.87	3.81	3.82
3	3	2	2		4.83	4.85	4.87	4.81	4.87	4.81	3.88	3.81	3.88	3.87	3.81	3.87
4	3	2	2		5.34	5.32	5.37	5.31	5.32	5.34	4.24	4.21	4.2	4.23	4.21	4.27
5	3	2	2		4.93	4.98	4.97	4.98	4.94	4.97	4.5	4.51	4.52	4.55	4.52	4.51
6	3	2	2		4.93	4.91	4.92	4.93	4.93	4.92	4.34	4.31	4.37	4.32	4.31	4.31
7	3	2	2		4.87	4.83	4.85	4.81	4.83	4.87	3.99	4.2	4.01	4	4.01	3.99
8	3	2	2		5.12	5.13	5.14	5.14	5.15	5.17	3.97	3.98	3.99	3.92	3.91	3.92
9	3	2	2		4.93	4.91	4.93	4.91	4.93	4.93	4.31	4.37	4.34	4.37	4.31	4.31
1	4	2	2		4.95	5.01	5.02	4.98	4.99	5.02	4.62	4.58	4.61	4.6	4.58	4.59
2	4	2	2		4.41	4.47	4.47	4.47	4.41	4.41	4.27	4.27	4.3	4.21	4.27	4.29
3	4	2	2		4.57	4.53	4.6	4.57	4.5	4.6	3.97	3.97	3.91	3.96	3.97	3.92
4	4	2	2		4.52	4.54	4.53	4.51	4.55	4.51	4.26	4.27	4.28	4.29	4.21	4.29
5	4	2	2		4.76	4.72	4.78	4.78	4.76	4.71	4.54	4.6	4.61	4.58	4.61	4.61
6	4	2	2		4.61	4.58	4.6	4.55	4.53	4.52	4.43	4.41	4.47	4.41	4.46	4.47
7	4	2	2		4.72	4.72	4.77	4.71	4.72	4.77	3.77	3.72	3.76	3.76	3.77	3.71
8	4	2	2		5.09	5.01	5.02	5.03	5.09	5.01	4.22	4.17	4.2	4.21	4.17	4.2
9	4	2	2		4.54	4.57	4.51	4.51	4.57	4.57	3.78	3.71	3.72	3.78	3.78	3.76
1	5	2	2		4.01	4.03	4.04	4.05	4.06	4.1	3.92	3.92	3.98	3.94	3.96	3.97
2	5	2	2		4.01	4.04	4.03	4.03	4.04	4.05	3.74	3.75	3.76	3.78	3.79	3.81
3	5	2	2		5.88	5.81	5.83	5.8	5.81	5.82	4.11	4.14	4.15	4.16	4.17	4.18
4	5	2	2		4.16	4.21	4.22	4.16	4.18	4.18	4.01	4.02	4.03	4.09	4.04	4.01
5	5	2	2		4.14	4.11	4.14	4.12	4.11	4.1	3.98	3.99	3.98	3.98	3.92	3.98
6	5	2	2		3.82	3.82	3.88	3.89	3.88	3.85	3.55	3.58	3.59	3.55	3.55	3.59
7	5	2	2		4.23	4.23	4.24	4.26	4.25	4.24	3.93	3.98	3.91	3.98	3.99	3.98
8	5	2	2		4.32	4.33	4.35	4.32	4.36	4.37	4.25	4.27	4.28	4.24	4.27	4.21
9	5	2	2		3.74	3.76	3.77	3.78	3.79	3.71	3.68	3.65	3.64	3.65	3.65	3.64
1	6	2	2	117.43	3.88	3.87	3.86	3.85	3.82	3.8	3.84	3.83	3.84	3.84	3.84	3.82
2	6	2	2	76.09	3.67	3.65	3.65	3.66	3.67	3.64	3.56	3.58	3.58	3.59	3.57	3.58
3	6	2	2	80.27	4.32	4.33	4.35	4.36	4.37	4.38	4.12	4.14	4.12	4.15	4.13	4.13
4	6	2	2	103.03	4.05	4.04	4.03	4.05	4.06	4.06	3.97	3.94	3.94	3.92	3.96	3.94
5	6	2	2	114.9	3.95	3.96	3.98	3.99	3.97	3.97	3.86	3.84	3.86	3.85	3.86	3.88
6	6	2	2	104.02	3.71	3.78	3.76	3.76	3.75	3.74	3.58	3.62	3.6	3.6	3.61	3.58
7	6	2	2	65.8	4.01	4.02	4.03	4.05	4.03	4.02	3.98	3.91	3.96	3.95	3.95	3.92
8	6	2	2	61.95	3.87	3.88	3.89	3.84	3.89	3.86	3.88	3.89	3.82	3.89	3.86	3.87
9	6	2	2	81.03	3.65	3.66	3.64	3.61	3.65	3.63	3.56	3.58	3.57	3.57	3.59	3.57
1	1	1	3	26.82	3.12	3.06	3.1	3.06	3.11	3.13	2.89	2.9	2.83	2.9	2.8	2.8
2	1	1	3	25.47	3.27	3.22	3.24	3.27	3.22	3.2	3.19	3.55	3.16	3.1	3.19	3.12
3	1	1	3	21.88	2.89	2.93	2.99	2.86	2.87	2.91	3.15	3.16	3.19	3.09	3.12	3.1
4	1	1	3	36.53	3.14	3.11	3.08	3.04	3.13	3.09	3.02	3.06	3.1	3.08	3.12	3.09
5	1	1	3	28.74	3.27	3.31	3.29	3.38	3.24	3.29	3.56	3.57	3.43	3.49	3.5	3.53
6	1	1	3	24.05	3	3.05	2.99	3.06	3.1	2.99	3.35	3.37	3.27	3.2	3.3	3.31
7	1	1	3	21.83	2.87	2.88	2.94	2.97	2.92	2.97	2.74	2.71	2.79	2.83	2.79	2.79
8	1	1	3	20.31	3.11	3.12	3.14	2.99	3.11	3.08	2.68	2.74	2.68	2.71	2.73	2.74
1	2	1	3		3.41	3.45	3.48	3.51	3.49	3.5	3.45	3.41	3.4	3.5	3.41	3.51
2	2	1	3		3.44	3.47	3.49	3.51	3.52	3.51	3.39	3.34	3.36	3.34	3.3	3.37
3	2	1	3		3.38	3.39	3.39	3.43	3.37	3.43	3.26	3.27	3.29	3.34	3.27	3.27
4	2	1	3		3.91	3.92	3.94	3.9	3.87	3.9	3.23	3.17	3.23	3.14	3.2	3.17
5	2	1	3		3.64	3.61	3.64	3.65	3.63	3.68	3.77	3.85	3.84	3.79	3.8	3.83
6	2	1	3		3.76	3.85	3.76	3.85	3.81	3.86	3.34	3.36	3.37	3.42	3.4	3.42
7	2	1	3		3.34	3.3	3.37	3.42	3.42	3.4	3.05	3.09	3.14	3.14	3.1	3.09
8	2	1	3		3.52	3.56	3.53	3.64	3.63	3.66	3.06	3.06	3.05	3.06	3.04	3.05
1	3	1	3		4.61	4.67	4.67	4.61	4.65	4.61	4.11	4.17	4.19	4.1	4.18	4.1
2	3	1	3		4.01	4	4.03	4.07	3.98	4.02	3.48	3.53	3.51	3.5	3.54	3.55
3	3	1	3		4.17	4.21	4.18	4.12	4.14	4.12	3.61	3.63	3.66	3.6	3.62	3.58
4	3	1	3		4.41	4.51	4.52	4.45	4.44	4.43	3.78	3.81	3.83	3.77	3.79	3.76
5	3	1	3		4.32	4.31	4.3	4.34	4.35	4.36	4.21	4.33	4.26	4.2	4.33	4.19
6	3	1	3		4.07	4.04	4.09	4.1	4.02	4.01	3.72	3.77	3.74	3.79	3.78	3.74
7	3	1	3		4.25	4.26	4.6	4.24	4.25	4.2	3.75	3.74	3.7	3.76	3.7	3.73
8	3	1	3		4.07	3.98	4.02	4.03	3.99	4	3.82	3.83	3.82	3.83	3.8	3.84
1	4	1	3		4.24	4.27	4.29	4.26	4.27	4.35	4.09	4.11	4.13	4.14	4.18	4.19
2	4	1	3		4.27	4.3	4.38	4.31	4.29	4.35	4.03	4.06	4.01	4.09	4	4.02
3	4	1	3		4.02	4.08	4.07	4.03	4.02	4.06	3.53	3.51	3.54	3.51	3.47	3.46
4	4	1	3		4.15	4.24	4.2	4.25	4.17	4.25	4.02	4.03	4.04	3.96	4.02	4.01
5	4	1	3		4.41	4.51	4.47	4.5	4.45	4.43	4.02	4.12	4.1	4.11	4.18	4.1
6	4	1	3		3.85	3.76	3.83	3.8	3.83	3.83	3.5	3.53	3.57	3.58	3.5	3.51
7	4	1	3		3.93	3.96	3.96	3.91	3.89	3.88	3.63	3.59	3.56	3.55	3.62	3.56
8	4	1	3		4.05	3.96	4.03	4.01	4.07	3.99	3.85	3.88	3.85	3.83	3.84	3.82
1	5	1	3		3.97	3.99	3.9	3.99	3.99	3.97	3.9	3.83	3.89	3.81	3.8	3.83
2	5	1	3		3.8	3.85	3.88	3.81	3.8	3.79	3.69	3.67	3.66	3.65	3.69	3.66
3	5	1	3		3.79	3.78	3.8	3.77	3.75	3.75	3.59	3.62	3.64	3.56	3.59	3.62
4	5	1	3		3.98	3.94	3.97	3.98	3.94	4	3.8	3.79	3.77	3.74	3.74	3.77
5	5	1	3		4.34	4.37	4.33	4.37	4.3	4.29	3.99	3.98	4.03	4.03	4.03	4.01
6	5	1	3		3.8	3.78	3.74	3.75	3.83	3.79	3.77	3.78	3.77	3.79	3.8	3.79
7	5	1	3		3.9	3.92	3.88	3.87	3.89	3.85	3.6	3.58	3.59	3.6	3.58	3.56
8	5	1	3		4.01	3.98	3.94	3.9	3.99	3.95	3.76	3.77	3.79	3.79	3.72	3.71
1	6	1	3	23.48	3.68	3.69	3.73	3.66	3.68	3.69	3.48	3.57	3.6	3.5	3.5	4.49
2	6	1	3	22.87	3.55	3.51	3.5	3.54	3.54	3.5	3.5	3.45	3.49	3.48	3.48	3.4
3	6	1	3	20.9	3.56	3.5	3.5	3.56	3.55	3.54	3.51	3.45	3.45	3.4	3.49	3.49
4	6	1	3	34.34	3.88	3.8	3.86	3.84	3.87	3.86	3.78	3.77	3.78	3.76	3.69	3.7
5	6	1	3	27.57	4.25	4.2	4.22	3.24	4.24	4.2	3.88	3.9	3.91	3.92	3.93	3.93
6	6	1	3	21.1	3.7	3.66	3.69	3.68	3.7	3.67	3.66	3.7	3.65	3.62	3.64	3.61
7	6	1	3	19.56	3.89	3.79	3.8	3.83	3.86	3.87	3.55	3.58	3.58	3.54	3.51	3.6
8	6	1	3	19.25	3.78	3.87	3.8	3.86	3.84	3.8	3.69	3.68	3.71	3.72	3.67	3.7
1	1	2	3	28.84	2.9	2.87	2.79	2.91	2.89	2.9	2.82	2.87	2.83	2.89	2.86	2.83
2	1	2	3	37.53	3.54	3.45	3.51	3.45	3.42	3.41	3.43	3.46	3.41	3.34	3.45	3.4
3	1	2	3	29	3.11	3.14	3.17	3.1	3.09	3.12	2.77	2.83	2.87	2.79	2.82	2.83
4	1	2	3	28.82	3.35	3.33	3.33	3.38	3.35	3.39	3.48	3.51	3.43	3.47	3.49	3.47
5	1	2	3	29.75	3.06	3.09	3	3.01	3.03	2.99	2.82	2.89	2.86	2.86	2.81	2.83
6	1	2	3	37.57	3.04	3.11	3.12	3.09	3.1	3.08	2.96	2.91	2.94	2.99	3.01	3
7	1	2	3	30.27	2.69	2.65	2.71	2.69	2.77	2.71	2.78	2.82	2.84	2.88	2.85	2.84
8	1	2	3	29.63	3.24	3.2	3.2	3.19	3.27	3.17	3.03	3.07	3.04	2.99	2.92	2.98
1	2	2	3		4.06	4.1	4.14	4.09	4.1	4.11	3.26	3.23	3.31	3.24	3.28	3.2
2	2	2	3		4.16	4.13	4.1	4.11	4.13	4.16	3.75	3.7	3.77	3.72	3.68	3.75
3	2	2	3		3.87	3.8	3.86	3.78	3.83	3.8	3.53	3.53	3.47	3.55	3.46	3.45
4	2	2	3		4.46	4.52	4.51	4.47	4.44	4.42	3.86	3.84	3.76	3.84	3.76	3.8
5	2	2	3		3.61	3.51	3.52	3.54	3.6	3.59	3.06	3.16	3.09	3.15	3.13	3.1
6	2	2	3		3.81	3.83	3.85	3.88	3.86	3.86	3.34	3.26	3.3	3.25	3.28	3.32
7	2	2	3		3.67	3.71	3.63	3.97	3.61	3.67	3.31	3.36	3.33	3.37	3.38	3.31
8	2	2	3		3.84	3.77	3.85	3.85	3.86	3.81	3.68	3.53	3.63	3.52	3.6	3.57
1	3	2	3		4.57	4.51	4.47	4.5	4.55	4.49	4.05	4.02	4.02	4.11	4.1	4.05
2	3	2	3		4.66	4.6	4.65	4.64	4.67	4.56	4.38	4.27	4.35	4.36	4.26	4.25
3	3	2	3		4.49	4.49	4.46	4.49	4.43	4.47	4.05	3.99	3.96	3.98	4	4.01
4	3	2	3		4.85	4.88	4.86	4.81	4.84	4.85	4.29	4.23	4.29	4.28	4.26	4.3
5	3	2	3		4.04	4	4.05	4.04	4.05	4.07	3.34	3.36	3.4	3.31	3.38	3.39
6	3	2	3		4.37	4.33	4.37	4.32	4.31	4.29	3.81	3.89	3.86	3.82	3.8	3.85
7	3	2	3		4.34	4.39	4.39	4.4	4.4	4.34	3.83	3.91	3.93	3.9	3.89	3.9
8	3	2	3		4.16	4.17	4.2	4.23	4.19	4.25	3.8	3.88	3.86	3.89	3.9	3.84
1	4	2	3		4.01	4.02	4.08	4.04	4.02	4.07	3.94	3.88	3.87	3.9	3.91	3.93
2	4	2	3		4.15	4.13	4.1	4.13	4.1	4.12	3.88	3.78	3.8	3.79	3.83	3.84
3	4	2	3		4.08	4.08	4	4.01	4.07	4.01	3.71	3.71	3.68	3.69	3.7	3.7
4	4	2	3		4.1	4.09	4.05	4	4.01	4.02	3.99	3.89	3.94	3.9	3.89	3.9
5	4	2	3		4.28	4.36	4.31	4.33	4.34	4.32	4.03	3.99	4.05	3.97	3.99	4
6	4	2	3		3.78	3.77	3.79	3.8	3.86	3.8	3.46	3.49	3.5	3.5	3.46	3.53
7	4	2	3		3.86	3.78	3.8	3.83	3.81	3.79	3.61	3.58	3.57	3.6	3.6	3.58
8	4	2	3		4.04	3.98	3.99	4.01	4.03	4.01	3.7	3.73	3.75	3.7	3.7	3.69
1	5	2	3		3.9	3.84	3.89	3.89	3.88	3.87	3.81	3.82	3.8	3.78	3.75	3.71
2	5	2	3		4.01	3.93	3.99	4	4	3.93	3.78	3.68	3.71	3.67	3.69	3.73
3	5	2	3		3.81	3.87	3.85	3.81	3.82	3.81	3.58	3.6	3.63	3.65	3.59	3.6
4	5	2	3		4.02	4.09	4.1	4.07	4.07	4.03	3.69	3.69	3.71	3.72	3.7	3.7
5	5	2	3		3.99	3.98	4.01	4.07	4.06	4.01	3.82	3.87	3.8	3.81	3.88	3.8
6	5	2	3		3.52	3.56	3.66	3.56	3.57	3.6	3.41	3.46	3.42	3.39	3.36	3.39
7	5	2	3		3.76	3.7	3.69	3.69	3.7	3.73	3.59	3.58	3.57	3.6	3.6	3.58
8	5	2	3		3.79	3.85	3.8	3.78	3.79	3.79	3.6	3.6	3.57	3.58	3.59	3.6
1	6	2	3	26.76	3.73	3.69	3.72	3.68	3.7	3.71	3.61	3.67	3.69	3.7	3.62	3.63
2	6	2	3	35.57	3.89	3.88	3.83	3.83	3.85	3.84	3.71	3.7	3.65	3.66	3.65	3.67
3	6	2	3	26.87	3.7	3.72	3.74	3.71	3.65	3.66	3.51	3.53	3.54	3.51	3.49	3.51
4	6	2	3	27.43	3.89	3.91	3.83	3.86	3.85	3.83	3.68	3.65	3.66	3.65	3.7	3.7
5	6	2	3	28.48	3.7	3.69	3.67	3.65	3.65	3.73	3.38	3.5	3.55	3.55	3.48	3.52
6	6	2	3	34.42	3.44	3.44	3.48	3.49	3.5	3.41	3.46	3.34	3.39	3.4	3.4	3.38
7	6	2	3	28.8	3.66	3.6	3.6	3.6	3.6	3.61	3.49	3.48	3.46	3.46	3.47	3.46
8	6	2	3	27.53	3.56	3.54	3.58	3.57	3.59	3.6	3.5	3.45	3.45	3.41	3.41	3.44
